# Supplementary material for: Using G6PD tests to enable the safe treatment of Plasmodium vivax infections with primaquine on the Thailand-Myanmar border: A cost-effectiveness analysis
Source: PubMed Central journal article supplement (PMC5460895; doi:10.1371/journal.pntd.0005602), 2017-05-24
Supplement: pntd.0005602.s003.pdf [file pntd.0005602.s003.pdf]

Screening strategy versus chloroquine strategy

**Males**

**A) Base case incremental costs = \$0.2**

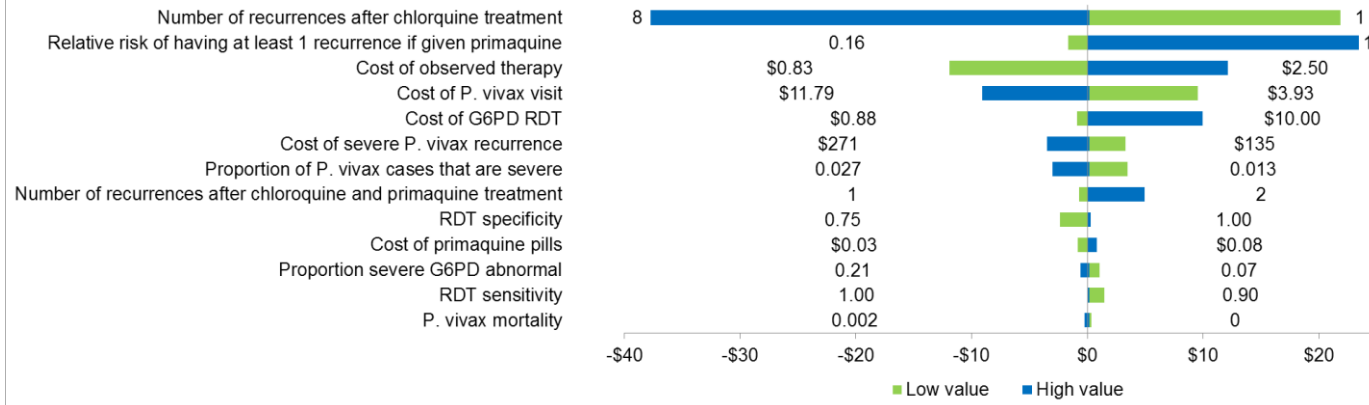

**Females**

**B) Base case incremental costs = \$0.3**

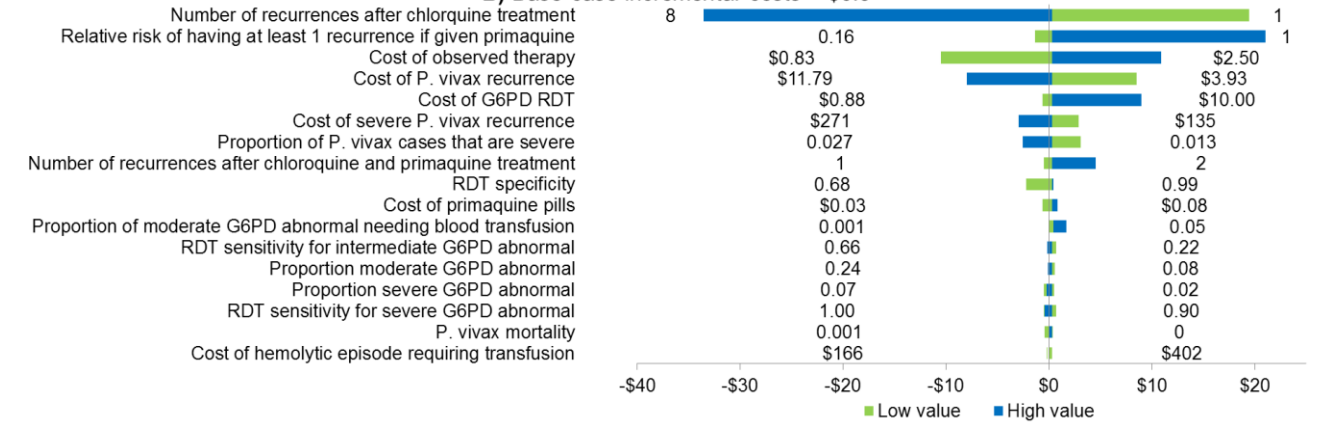

**C) Base case DALYs averted = 0.026**

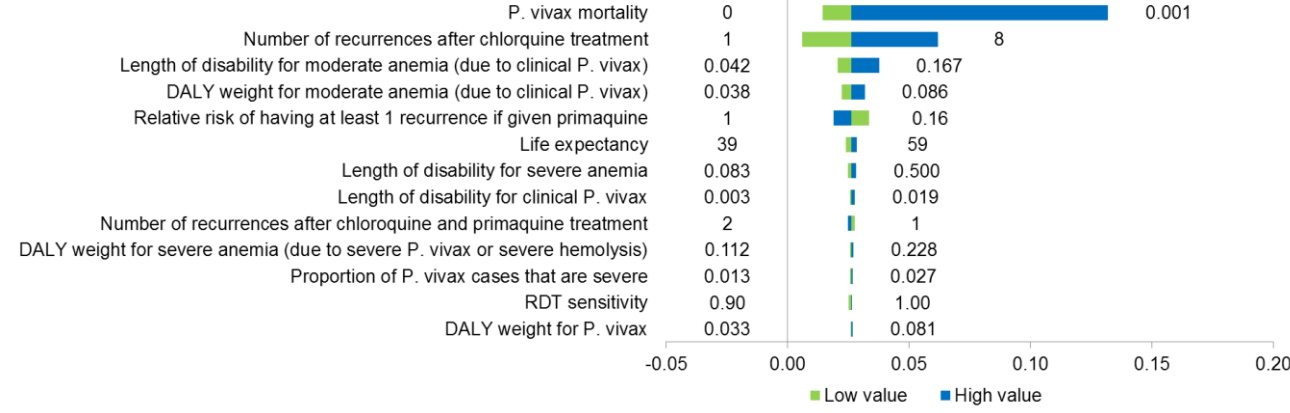

**D) Base case DALYs averted = 0.024**

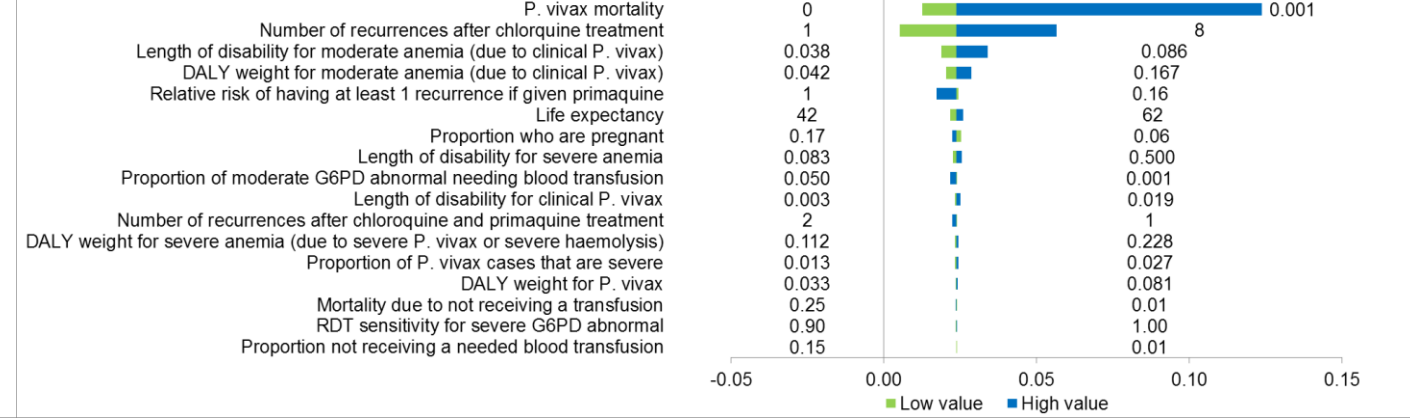

**E) Base case cost savings = \$7.1**

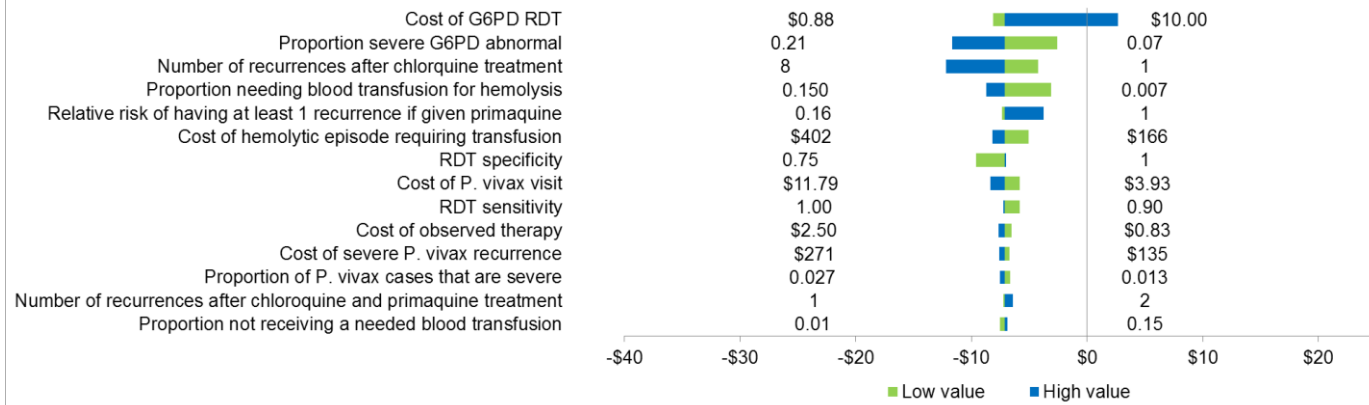

**F) Base case cost savings = \$2.2**

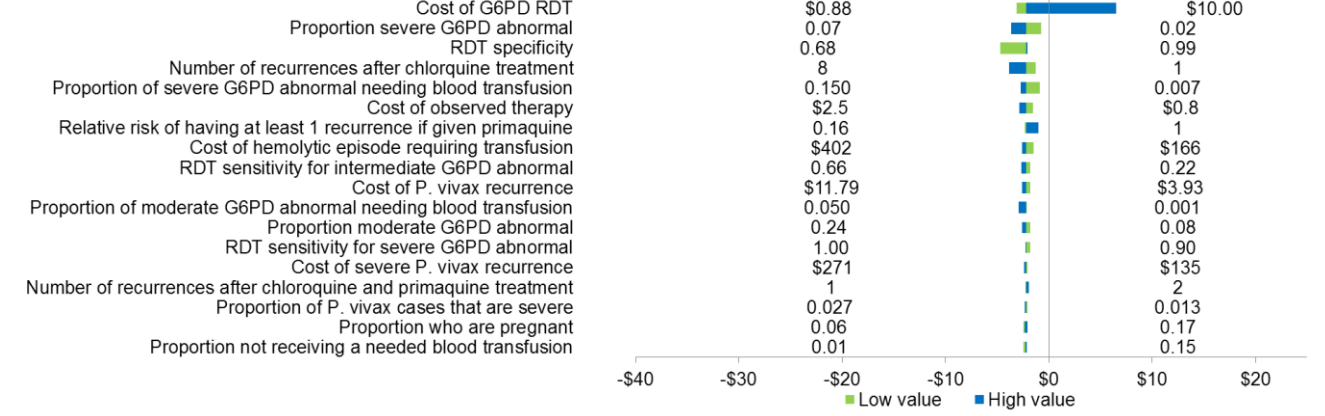

**G) Base case DALYs averted = 0.011**

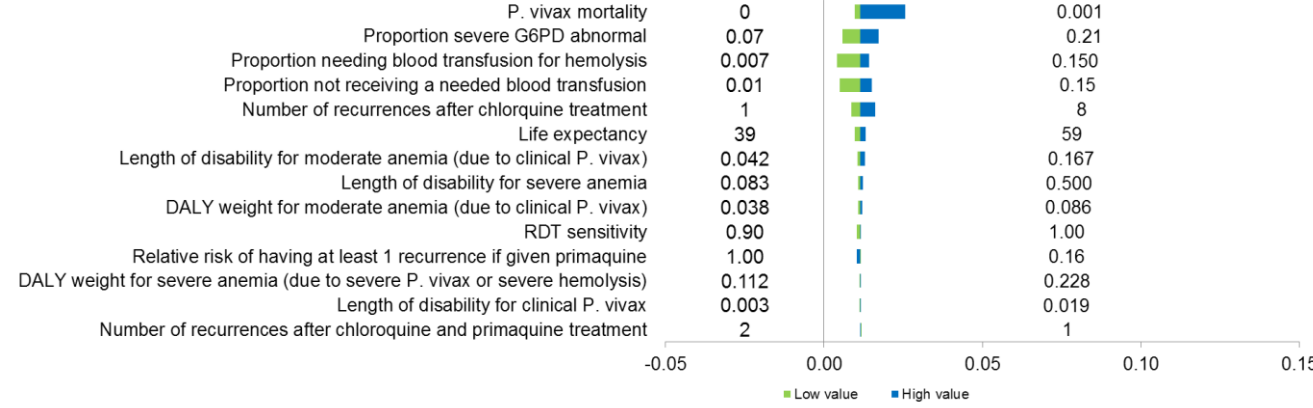

**H) Base case DALYs averted = 0.004**

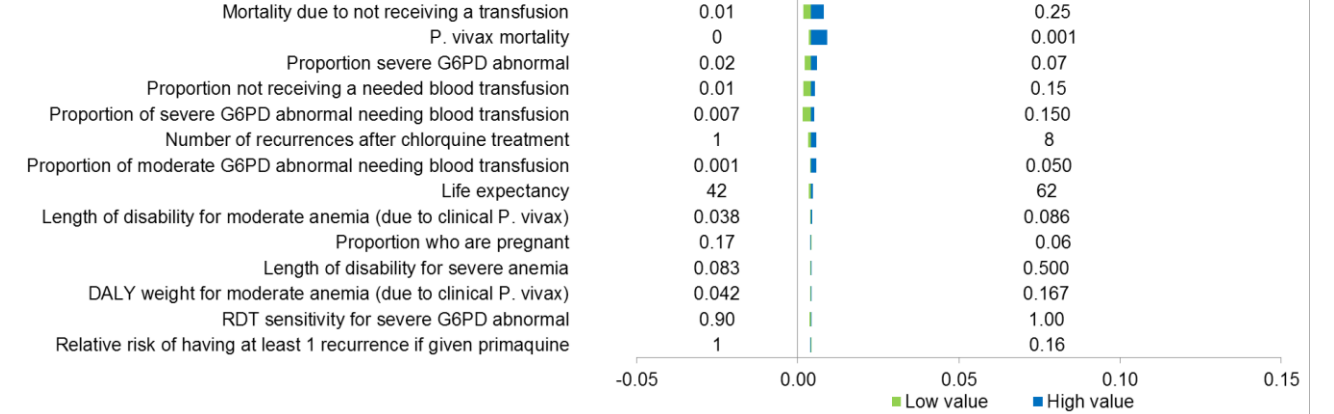

Screening strategy versus primaquine strategy
